# Supplementary material for: A four-gene prognostic signature for predicting the overall survival of patients with lung adenocarcinoma
Source: PeerJ. 2021 Sep 23;9:e11911. doi: 10.7717/peerj.11911 (PMC8465999; doi:10.7717/peerj.11911)
Supplement: Supplemental Information 2 — The raw data type of gene expression RNAseq downloaded from the public database was FPKM, while the gene expression data in this table was standardized, using z-score function. All the samples were primary tumor. [file peerj-09-11911-s002.csv]

Sample	Gender	Age	Tstage	Nstage	Mstage	Stage	time	status	TRAF3IP3	PITX3	MYLIP	CENPH
GSM1213670	female	68	T1	N0	M0	I	90.2	0	0.765798531	-0.239026788	-1.455296566	-1.498996869
GSM1213671	male	69	T2	N0	M0	I	87.8	0	-0.232191345	-1.833361214	0.837429376	-0.245716554
GSM1213672	female	82	T1	N0	M0	I	82.1	0	0.887162714	-0.806211301	-0.134130908	-0.894880133
GSM1213673	male	68	T2	N0	M0	I	22.9	1	-0.427063542	-0.760025425	-1.353589775	-0.696489534
GSM1213676	male	71	T2	N0	M0	I	52	1	-0.159129311	0.221151573	1.898004804	2.265348007
GSM1213677	female	44	T2	N0	M0	I	74.6	0	-1.768695079	0.436052323	0.686577614	2.091573602
GSM1213678	female	74	T2	N1	M0	II	49	1	-0.756352042	0.350205824	-0.025479303	0.285148094
GSM1213679	male	66	T1	N0	M0	I	75.7	0	1.09651962	-0.716731158	-0.721743715	-0.554214949
GSM1213680	female	59	T2	N0	M0	I	71.9	0	0.352330594	-0.187696578	-0.649538491	1.447690405
GSM1213681	female	71	T2	N0	M0	I	63.8	0	-0.529295524	-0.252606367	0.398124793	0.455436641
GSM1213682	female	73	T1	N0	M0	I	66.7	0	-0.320408662	-0.512894389	-1.188643514	-0.560412728
GSM1213683	male	79	T2	N0	M0	I	60.2	0	0.207817186	-0.646543934	-1.213696928	-0.38184118
GSM1213685	male	52	T1	N0	M0	I	81.1	0	0.014212341	-0.753433623	0.074241271	-0.465226165
GSM1213686	male	86	T2	N0	M0	I	34.1	1	-0.447530473	0.413724713	0.925774346	0.864418342
GSM1213687	male	77	T2	N0	M0	I	77.5	0	-0.246132216	-0.814353724	3.08474492	-0.609870378
GSM1213688	male	73	T1	N0	M0	I	69.1	0	-1.319892088	-0.777192063	0.044314334	-1.004173724
GSM1213689	female	77	T1	N0	M0	I	59.4	0	1.254595297	0.750335892	1.801379881	0.035595928
GSM1213690	female	79	T2	N1	M0	II	61.4	0	-0.751171941	-0.782389638	0.983152394	-1.155222099
GSM1213691	male	79	T2	N0	M0	I	76.7	0	-1.543058317	0.484364479	-0.867405966	1.676643292
GSM1213692	female	55	T1	N0	M0	I	68.9	1	0.436232497	-1.35069885	1.036478143	0.255926037
GSM1213693	female	62	T2	N1	M0	II	13.2	1	-1.980448724	0.637509921	-0.776034793	-1.728094476
GSM1213694	female	69	T1	N1	M0	II	80.3	0	-0.516990981	-1.249685549	-0.232413905	-0.238436523
GSM1213695	female	63	T2	N1	M0	II	70.1	0	0.337913263	-0.693744701	-0.668900631	2.0755525
GSM1213696	male	67	T2	N0	M0	I	62.2	0	0.048268814	-1.147334587	0.440911788	0.255926037
GSM1213697	male	80	T2	N0	M0	I	76.4	0	1.36179562	0.046077823	-0.031943188	-0.159979559
GSM1213698	female	70	T2	N1	M0	II	67.6	1	0.929793865	0.402787179	-0.697096573	-0.742100156
GSM1213699	male	61	T1	N0	M0	I	22.6	1	0.68398054	-0.793586718	0.288224859	-0.753838812
GSM1213700	female	74	T2	N0	M0	I	48.4	1	-0.119005592	-0.026668258	-1.290985755	0.688865772
GSM1213702	male	56	T3+4	N0	M0	II	35.2	1	-1.948447287	2.117960227	1.175494207	2.357888087
GSM1213703	female	76	T2	N0	M0	I	71.5	1	-0.070510934	-1.014630055	0.113364877	-1.028062545
GSM1213704	male	62	T2	N1	M0	II	66.5	0	-0.082939004	-0.738606226	-0.397677892	1.318610483
GSM1213707	female	42	T2	N0	M0	I	64.9	0	-0.213166629	-1.295119406	0.204902725	-0.169561262
GSM1213710	male	68	T2	N1	M0	II	4	0	0.050870896	-0.486447318	-0.242532498	1.659378859
GSM1213715	female	73	T2	N1	M0	II	88.3	0	-1.394293665	0.707680507	1.612260461	1.805564651
GSM1213716	male	74	T2	N0	M0	I	52.4	1	-0.867208434	0.78540122	2.249332493	1.275422343
GSM1213717	male	63	T2	N0	M0	I	58.9	1	0.019021862	-0.523921766	-0.48063195	0.824001271
GSM1213720	male	68	T1	N0	M0	I	76.4	0	-0.505966624	-0.597948939	0.477731452	-0.834754753
GSM1213722	female	69	T2	N0	M0	I	15	1	-0.551145312	1.362192262	-1.14922649	0.586886191
GSM1213723	male	80	T2	N1	M0	II	31.3	1	0.372869716	2.80686848	-1.168270904	0.444883428
GSM1213724	male	77	T1	N0	M0	I	75.4	0	-1.113795004	-1.202884083	1.369570487	-0.825415927
GSM1213726	female	84	T2	N1	M0	II	78.7	0	0.981541928	-0.53103266	1.139105121	0.22561166
GSM1213727	male	49	T1	N1	M0	II	69.5	1	1.520686253	1.155220975	-1.700443267	0.566410239
GSM1213728	male	76	T1	N0	M0	I	64.7	0	-0.368577659	0.444101576	-0.260316429	-1.162163611
GSM1213730	male	65	T2	N0	M0	I	38.5	1	0.109282984	0.772766655	-0.310654172	-0.124791274
GSM1213733	male	78	T2	N0	M0	I	41.8	1	-1.802552625	1.35626929	1.237080811	0.131012785
GSM1213734	female	71	T2	N1	M0	II	61.9	0	0.905961233	0.366310985	-0.676118028	-1.327083686
GSM1213735	female	68	T2	N0	M0	I	72.7	0	-1.599230882	-0.293764371	-0.667843283	0.824970263
GSM1213736	female	54	T2	N0	M0	I	10.9	1	0.249118419	-0.745793654	-1.863200175	0.474314385
GSM1213737	female	64	T1	N0	M0	I	35.4	0	-1.01835699	0.329991184	1.380593642	-0.787664215
GSM1213738	male	64	T1	N1	M0	II	46.2	1	-0.201001655	0.842022175	0.152740232	-0.668407616
GSM1213739	female	75	T2	N0	M0	I	1.4	0	-0.314851564	1.105497954	1.17193499	-1.392608999
GSM1213740	female	86	T2	N0	M0	I	70.1	0	1.416888529	-0.045192521	0.36606059	-0.602614257
GSM1213741	male	81	T2	N0	M0	I	76.2	1	-0.285442584	-1.922565173	1.094219057	-1.006860477
GSM1213742	male	81	T2	N1	M0	II	63.1	1	-1.262811522	-0.072904047	-0.83417677	0.471662868
GSM1213743	female	40	T2	N0	M0	I	60.4	0	0.135263697	2.381525848	1.59683603	-0.847709056
GSM1213746	male	61	T2	N0	M0	I	62	0	0.888997968	0.762797427	0.19647693	-1.558681798
GSM1213747	female	57	T1	N1	M0	II	49.6	0	-1.279465168	-1.269653952	-0.882859911	-0.493571095
GSM1213749	male	78	T2	N0	M0	I	38.4	1	0.530226693	-0.698859088	-0.779416917	-0.832032764
GSM1213750	male	50	T2	N1	M0	II	12.4	1	-1.404769371	0.833443848	-0.943840581	1.112647896
GSM1213751	female	50	T1	N0	M0	I	58.9	0	1.798196209	-0.511689829	0.627829702	-0.71865682
GSM1213752	male	65	T2	N0	M0	I	11.6	1	-0.581807207	0.686547474	0.353301232	-0.563280696
GSM1213753	female	81	T2	N0	M0	I	37.1	1	-1.0058455	-0.270092446	0.216215826	-1.251663319
GSM1213754	male	73	T2	N1	M0	II	24.2	1	-1.272446605	0.932483934	-0.754563167	-1.6657983
GSM1213756	male	61	T1	N0	M0	I	63.2	0	-0.153928356	0.191513418	0.326237294	-0.599846964
GSM1213757	male	70	T2	N0	M0	I	69	0	0.437918557	-0.972706723	-0.05940298	-0.265545672
GSM1213758	male	62	T2	N0	M0	I	66.1	0	0.023306794	-0.387886394	0.694616235	-2.452435546
GSM1213759	male	49	T2	N0	M0	I	65.9	0	-1.585288407	-0.07585555	0.860748323	0.617417018
GSM1213760	female	78	T1	N0	M0	I	54.8	0	-0.732658978	0.713939559	0.383287199	0.862261389
GSM1213761	female	63	T1	N0	M0	I	59.2	0	-0.44804383	-0.425826693	2.842961245	-0.524605295
GSM1213762	female	58	T3+4	N0	M0	II	10.3	1	1.011549291	2.562755497	-0.619580303	1.452171682
GSM1213763	female	62	T2	N0	M0	I	23.4	1	2.28857155	-0.101444123	-0.720556152	0.015536516
GSM1213764	female	64	T2	N0	M0	I	93	0	1.258355643	0.926560962	0.099591576	-0.598159406
GSM1213768	male	61	T2	N0	M0	I	52.1	0	0.497237042	2.101582209	0.351334113	-0.735091946
GSM1213769	female	58	T1	N0	M0	I	63.5	0	1.993384442	-0.554152218	0.701081856	0.301522816
GSM1213770	male	69	T2	N1	M0	II	25.3	1	-0.081613899	0.986023613	-1.370759089	-0.692978508
GSM1213773	female	69	T2	N0	M0	I	57.5	1	-0.06436508	-0.258589235	-2.003544435	-1.645698619
GSM1213774	male	68	T2	N1	M0	II	36.1	1	1.006945114	-1.141661178	-1.518364151	-0.52659991
GSM1213775	male	71	T1	N0	M0	I	37.7	1	1.067452343	-0.971312496	0.714598199	1.780296588
GSM1213777	male	67	T2	N0	M0	I	65.4	0	-0.16491742	-0.539900481	1.589946776	1.103197069
GSM1213779	female	73	T2	N0	M0	I	37.3	0	2.11540476	-0.365868242	1.257177365	-0.53547815
GSM1213780	male	84	T1	N0	M0	I	7.8	1	-0.478593428	-0.429962791	0.267411253	-0.07422117
GSM1213781	male	71	T2	N1	M0	II	21.6	1	0.984094278	-0.282377623	0.313965809	-1.399671322
GSM1213782	male	75	T1	N0	M0	I	38.5	0	0.166716483	-1.454400782	-0.929553364	-0.437215978
GSM1213783	female	84	T1	N0	M0	I	7.2	1	1.41028707	0.168610149	-0.567105293	0.390388274
GSM1213784	male	66	T1	N0	M0	I	62.4	0	-0.721684353	0.002151329	1.196358162	-0.568884495
GSM1213785	male	74	T1	N0	M0	I	46.7	1	-0.912545942	0.464745464	0.895517531	0.390152947
GSM1213787	female	71	T2	N0	M0	I	41.2	0	2.308853993	0.075559585	0.037107354	0.370608234
GSM1213788	male	81	T2	N1	M0	II	17.9	1	-0.71133859	0.156078736	-0.290923958	-1.027216878
GSM1213792	female	80	T2	N0	M0	I	35	1	-0.573877434	-0.646543934	-0.778114765	0.610280448
GSM1213793	female	73	T2	N0	M0	I	32.3	0	0.756866107	-0.712408719	-0.721597874	1.900609012
GSM1213794	female	57	T1	N0	M0	I	59.9	0	0.790045058	-0.129851098	1.334186664	0.112795718
GSM1213795	female	60	T1	N0	M0	I	80	0	0.428230534	-0.063793317	0.765781473	-1.547837887
GSM1213797	male	71	T1	N0	M0	I	70.1	0	-0.081613899	-1.421584852	0.170206437	-0.951256644
GSM1213798	male	75	T2	N0	M0	I	130.6	0	0.170090206	0.2222796	0.357881336	-0.094692089
GSM1213800	female	84	T1	N0	M0	I	6.1	0	-0.389156887	-0.439090158	-1.442983412	-0.75693959
GSM1213801	male	77	T1	N1	M0	II	48.5	1	2.343887449	1.56964271	-0.128160104	0.201472411
GSM1213803	male	74	T2	N0	M0	I	18.5	0	-0.583406637	1.403074082	-0.078930059	0.758949128
GSM1213804	female	81	T2	N0	M0	I	94	0	-0.850896492	0.485805292	1.094444763	0.588787682
GSM1213805	male	47	T2	N0	M0	I	72.2	0	1.150921101	1.535818544	-0.561499093	0.086387515
GSM1213806	male	69	T2	N0	M0	I	20.5	0	0.361200453	0.2222796	-0.765310265	0.571521991
GSM1213807	male	70	T2	N1	M0	II	8.5	0	0.379110221	0.57479629	-0.520989997	0.919966804
GSM1213808	female	49	T1	N0	M0	I	60	0	-1.448042219	-0.693994264	-0.02618941	-0.376806192
GSM1213809	female	79	T1	N0	M0	I	15.2	0	0.383016552	-0.24349231	0.292047978	-0.685505936
GSM1213810	female	70	T2	N0	M0	I	1.8	0	-1.068361241	-1.977974914	1.758337664	0.310777327
GSM1213811	male	63	T1	N1	M0	II	16.4	0	2.016376451	-0.410936074	0.644724696	0.063163147
GSM1213812	male	62	T2	N1	M0	II	9.6	1	0.629991349	1.240847858	-0.781078464	0.440431094
GSM1213814	female	71	T2	N0	M0	I	61.2	0	0.478305371	0.060575796	-0.589800943	0.041589841
GSM1213816	male	71	T2	N1	M0	II	1.1	0	0.362379572	1.855296361	-0.036495513	-0.857247973
GSM1213818	female	85	T2	N1	M0	II	40.6	0	0.193637283	-1.609549386	-0.046971764	-0.700174224
GSM1213819	male	76	T2	N0	M0	I	18.2	1	-1.580287982	0.255834238	-1.262463407	1.68413474
GSM1213820	female	68	T2	N0	M0	I	22.9	1	-0.642970571	0.164653736	0.357610488	0.083534649
GSM1213824	female	71	T2	N1	M0	II	19.1	1	-0.434143066	0.304126429	-0.268605064	0.92691335
GSM1213825	female	64	T1	N0	M0	I	88.6	0	-0.94938738	0.201755502	1.25192535	-1.355715539
GSM1213826	male	72	T2	N0	M0	I	6.8	1	-0.931487238	0.180958548	-0.98382708	-0.305874653
GSM1213827	male	61	T1	N0	M0	I	50	0	-1.398169516	-0.303374227	-1.75909916	0.737550744
GSM1213831	male	77	T2	N1	M0	II	61.6	0	-2.110291331	-0.15671078	-1.052184877	-0.015608425
GSM1213833	female	69	T2	N0	M0	I	6.7	1	0.860278812	-0.020049836	-0.380315858	0.242673486
GSM1213834	female	68	T2	N0	M0	I	32.5	0	0.600362587	-0.053211827	-1.051915766	-0.741379074
GSM1213836	female	56	T1	N1	M0	II	15.1	0	-1.029156754	3.214731687	0.521695592	0.959772277
GSM1213837	female	74	T2	N0	M0	I	91.3	1	-0.246045587	-1.686012299	-2.230542603	2.314204126
GSM1213840	female	66	T1	N0	M0	I	14.8	1	-0.07156813	-1.550412831	0.435435803	1.084005976
GSM1213844	male	71	T1	N0	M0	I	54.5	0	-0.081613899	0.310877952	-0.699067163	0.372110802
GSM1213845	female	72	T2	N1	M0	II	14.4	1	0.731891253	2.684652268	-1.011384099	-1.320179926
GSM1213846	male	76	T2	N0	M0	I	3.7	1	0.845083423	-0.791922961	-0.402832679	0.746449119
GSM1213847	male	76	T1	N0	M0	I	99.1	0	1.361906313	-0.482028381	-0.45968813	-0.563088156
GSM1213848	female	76	T2	N1	M0	II	1.2	1	0.388002539	-0.449491963	-0.14805005	1.882157877
GSM1213849	female	60	T1	N0	M0	I	49.9	0	1.630445343	0.040850301	-0.064068158	0.505650608
